# Supplementary material for: One-Pot Synthesis of Photoluminescent Self-Assembled Carbon Dot Monolayer Films
Source: Hindawi journal article supplement (doi:10.1155/2019/2769519), 2019-04-04
Supplement: f1 [file 2769519.f1.pdf]

## Supporting information

### One-pot Synthesis of Photoluminescent Self-assembled Carbon Dots Monolayer Films

Hongchong Guo<sup>1</sup>, Wei Li<sup>1</sup>, Gang Sun<sup>2</sup>, Bo You<sup>1\*</sup>

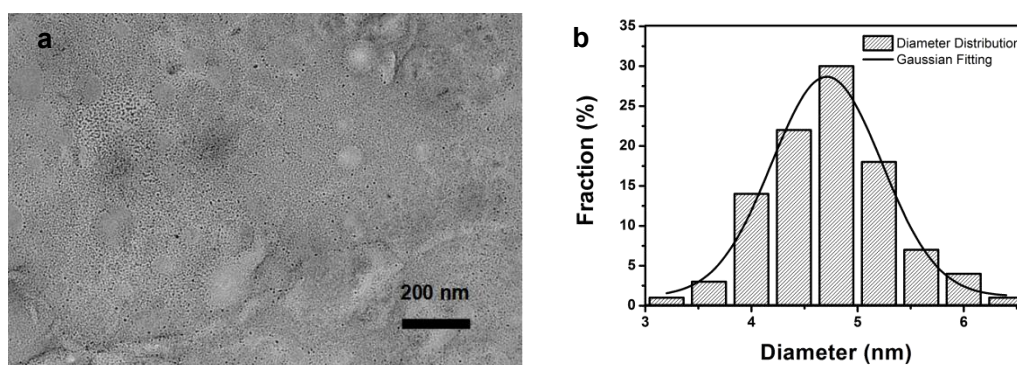

Fig. S1 HRTEM of carbon dots self-assembled monolayer films (CD-SAMFs) (a) and (b) the related size distribution of carbon dots in the CD-SAMFs.

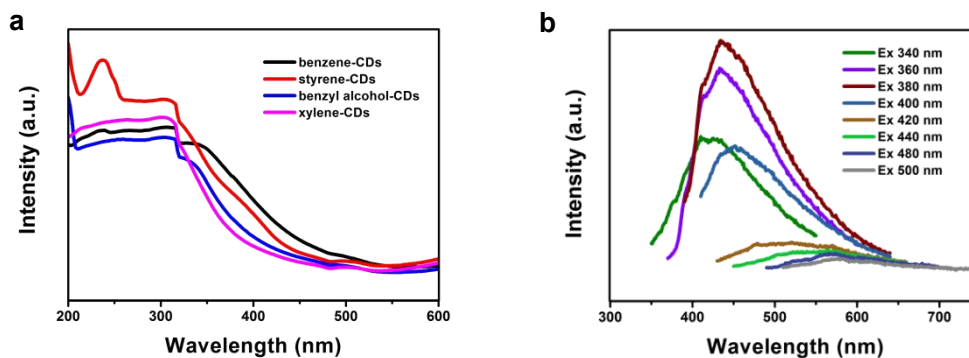

\* Corresponding author. Email: youbo@fudan.edu.cn

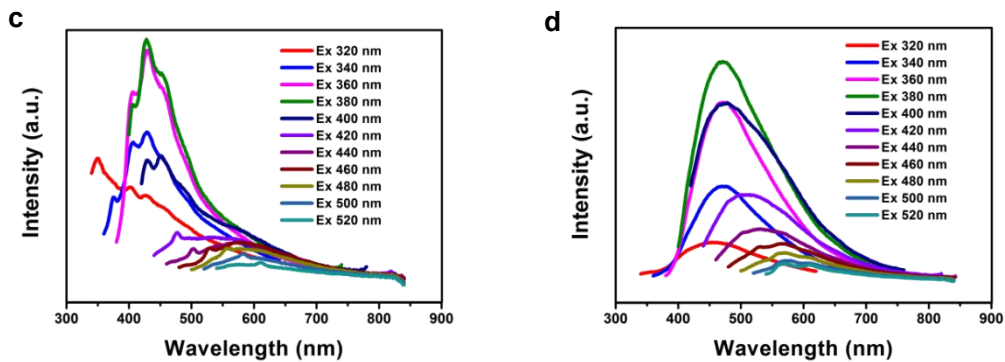

Fig. S2 UV-Vis spectra of the benzene series (a) and PL emission spectra of CDs by other benzene series: (b) benzene, (c) benzyl alcohol, (d) xylene.

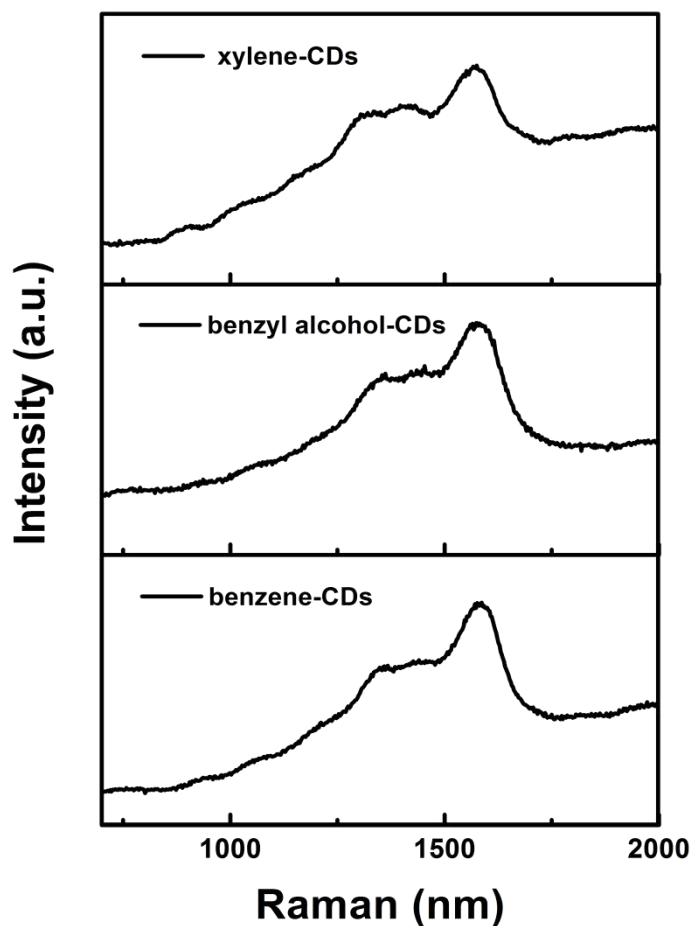

Fig. S3 Raman spectra of CDs synthesized by other benzene series.

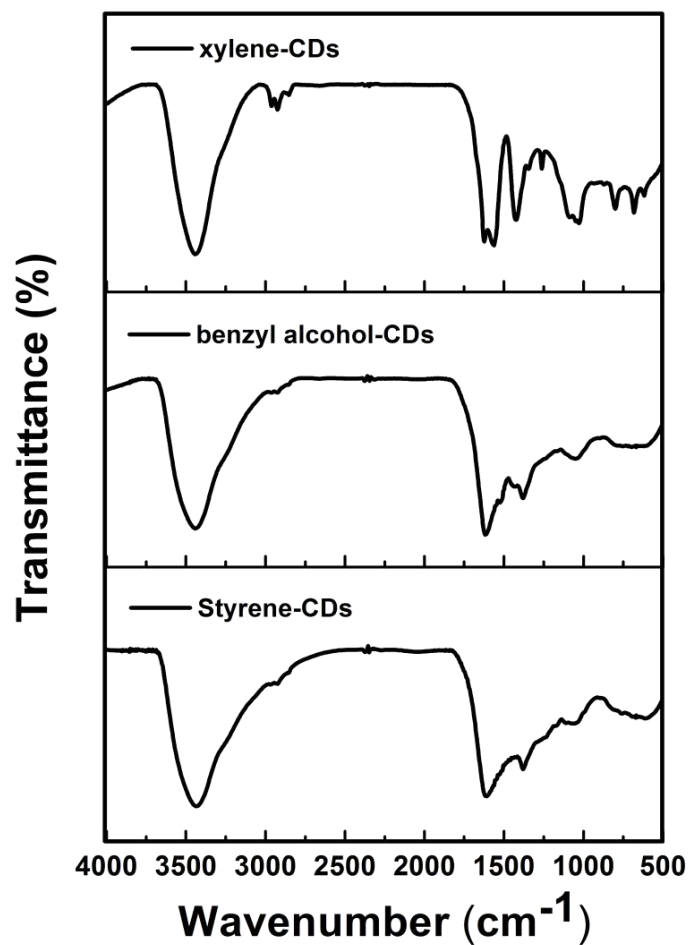

Fig. S4 FTIR spectra of CDs synthesized by other benzene series.

**Table 1S** GC-MS test

| Sample         | RM <sup>a</sup> (%) | SM <sup>b</sup> | Ratio <sup>c</sup> | Conversion(%) |
|----------------|---------------------|-----------------|--------------------|---------------|
| styrene        | 23.08               | 76.92           | 3.33               | 45            |
| xylene         | 18.96               | 81.04           | 4.27               | 45            |
| benzyl alcohol | 20.91               | 79.09           | 3.78               | 55            |
| benzene        | 17.43               | 82.57           | 4.74               | 79.2          |

<sup>a</sup>: reference material area

<sup>b</sup>: sample material area

<sup>c</sup>: SM/RM.
